# Supplementary material for: Conserved molecular signatures in the spike protein provide evidence indicating the origin of SARS-CoV-2 and a Pangolin-CoV (MP789) by recombination(s) between specific lineages of Sarbecoviruses
Source: PeerJ journal article supplement (doi:10.7717/peerj.12434), 2021-11-12
Supplement: Figure_S1.pdf [file Figure_S1.pdf]

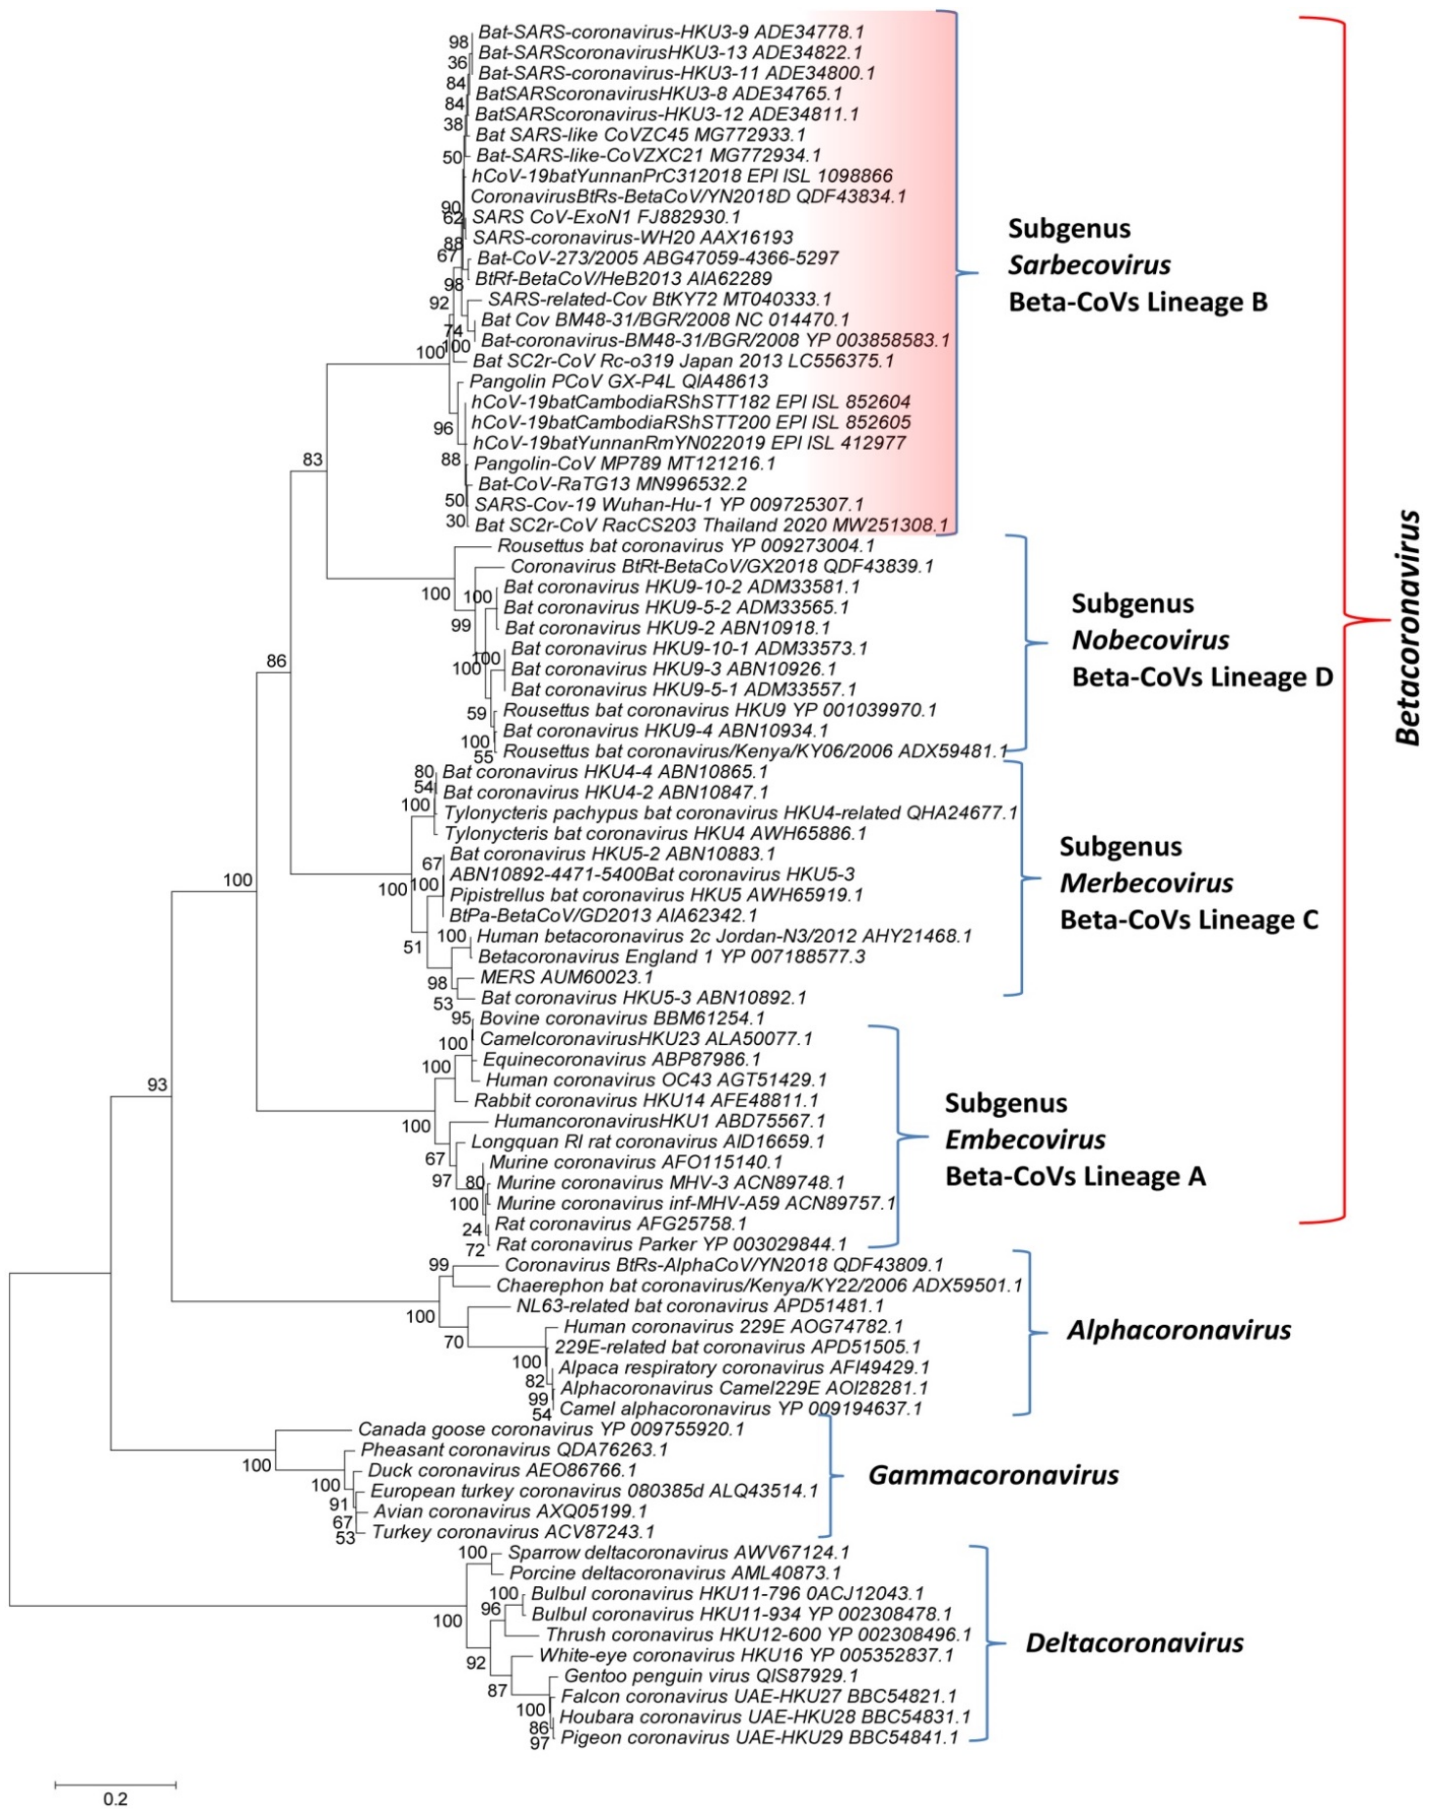

**Figure S1.** A maximum likelihood tree based on RNA dependent RNA polymerase protein sequences showing the branching of different coronaviruses.
