# Supplementary material for: Conserved molecular signatures in the spike protein provide evidence indicating the origin of SARS-CoV-2 and a Pangolin-CoV (MP789) by recombination(s) between specific lineages of Sarbecoviruses
Source: PubMed Central journal article supplement (PMC8592051; doi:10.7717/peerj.12434), 2021-11-12
Supplement: peerj-09-12434-s002.pdf [file peerj-09-12434-s002.pdf]

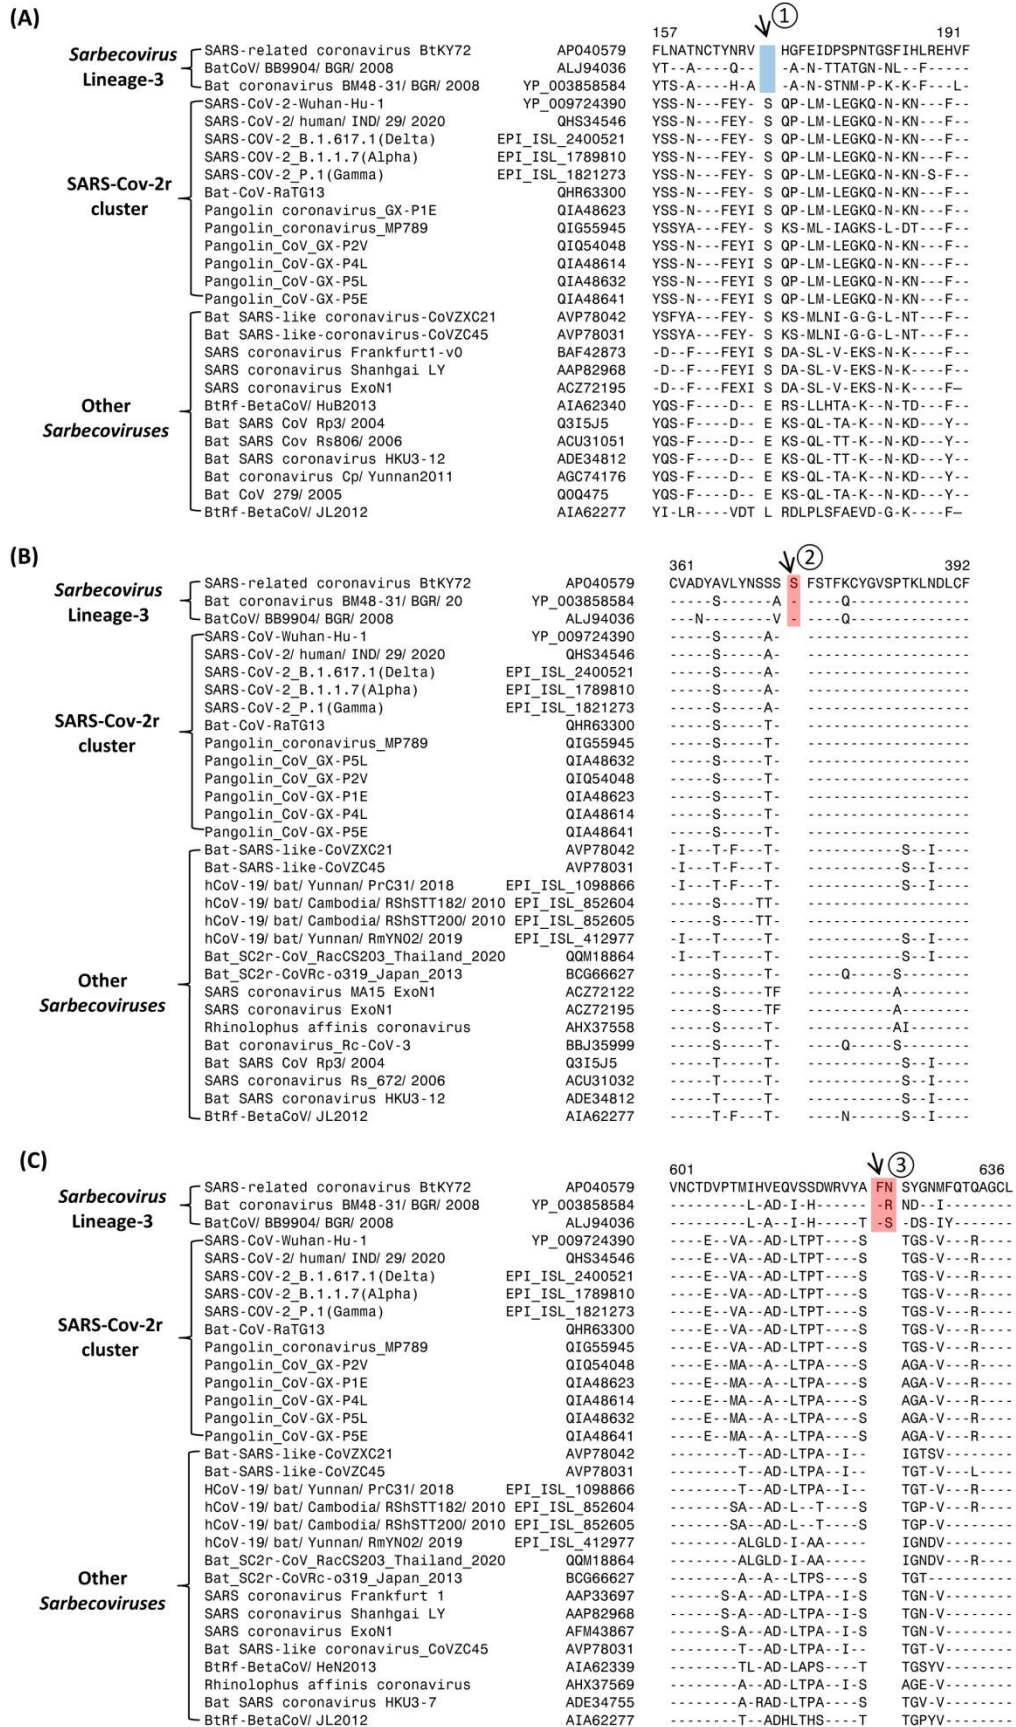

Figure S2. Excerpts from the sequence alignment for three regions of the spike protein depicting three CSIs which are specific for the CoVs from *Sarbecovirus* lineage-3
