# Supplementary material for: Conserved molecular signatures in the spike protein provide evidence indicating the origin of SARS-CoV-2 and a Pangolin-CoV (MP789) by recombination(s) between specific lineages of Sarbecoviruses
Source: PubMed Central journal article supplement (PMC8592051; doi:10.7717/peerj.12434), 2021-11-12
Supplement: peerj-09-12434-s003.pdf [file peerj-09-12434-s003.pdf]

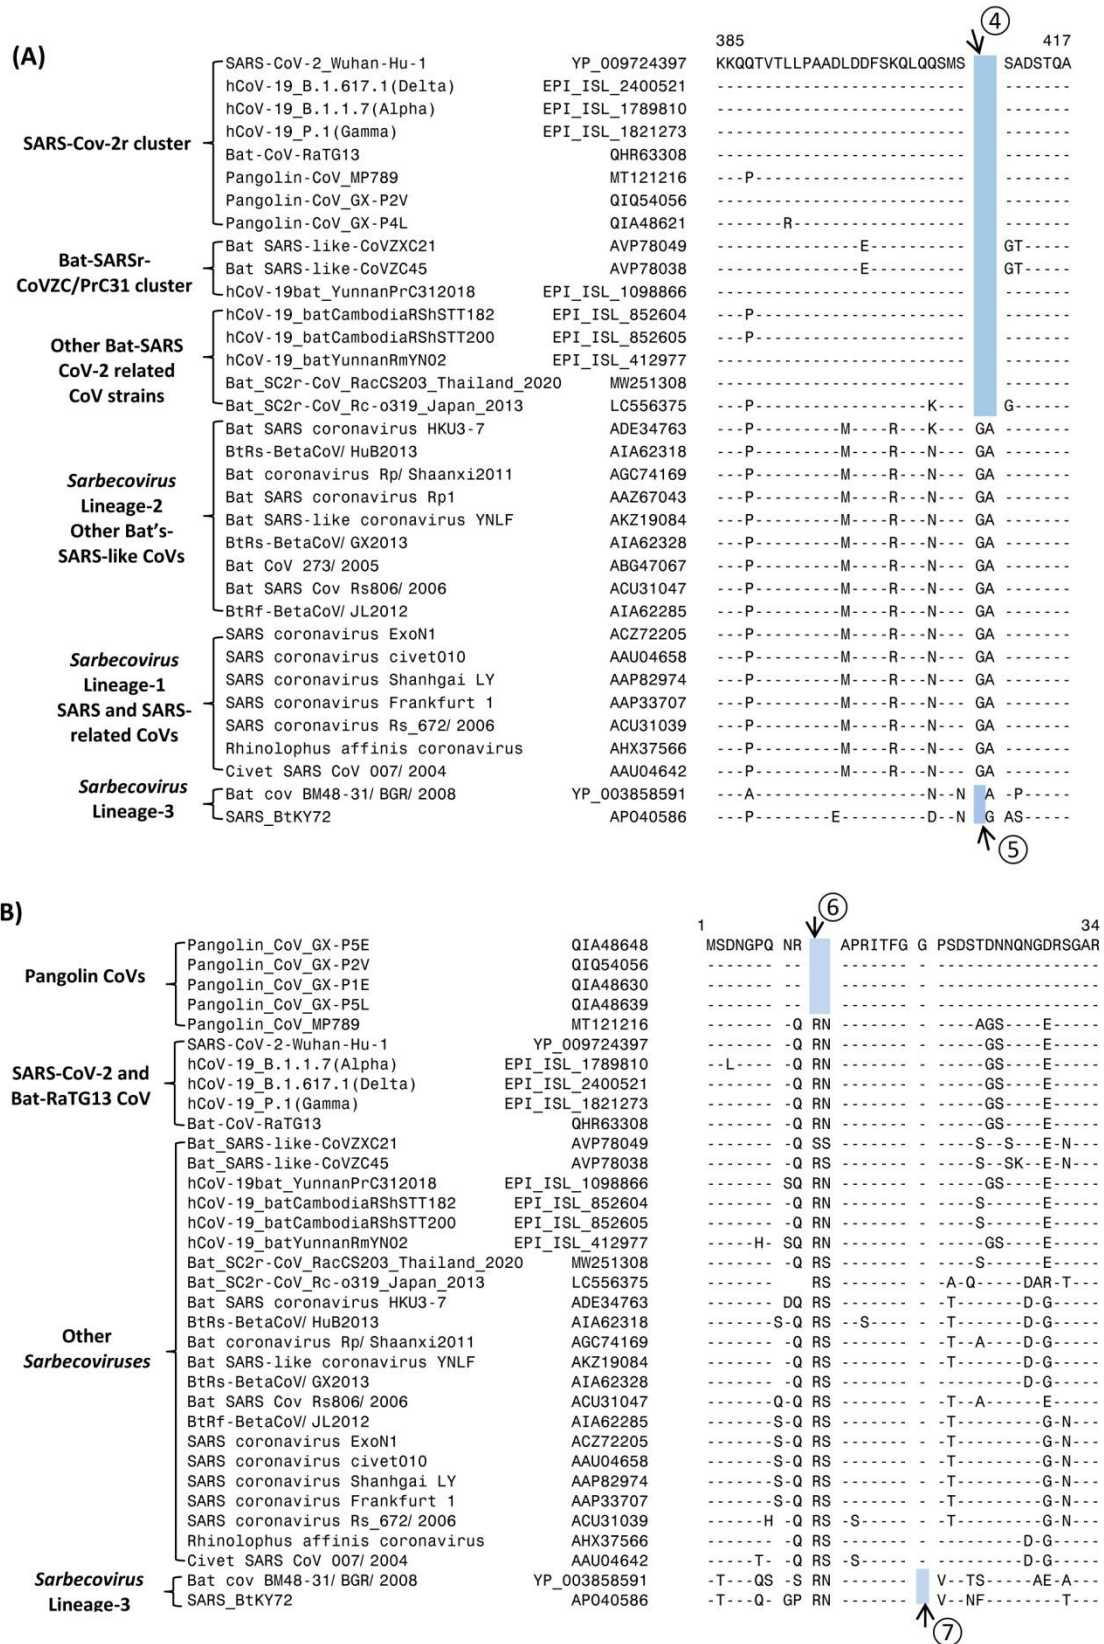

**Figure S3.** Panel (A) shows a 2 aa deletion (④) in the N-protein that is specific for the SARS-CoV-2r, CoVZC/PrC31 clusters as well as other Bat SARS-CoV-2 related strains of CoVs. The viruses from *Sarbecovirus* lineage-3 contain a separate 1 aa deletion (⑤) in this position. The panel (B) shows the sequence alignment of N-protein depicting a 2 aa deletion (⑥) that is specific for pangolin CoVs. A 1 aa deletion (⑦) specific for *Sarbecovirus* lineages-3 is also present in a neighboring region.
