# Supplementary material for: Conserved molecular signatures in the spike protein provide evidence indicating the origin of SARS-CoV-2 and a Pangolin-CoV (MP789) by recombination(s) between specific lineages of Sarbecoviruses
Source: PubMed Central journal article supplement (PMC8592051; doi:10.7717/peerj.12434), 2021-11-12
Supplement: peerj-09-12434-s004.pdf [file peerj-09-12434-s004.pdf]

**Figure S4. A multiple sequence alignment of the spike protein from pangolin-CoV\_MP789 and representative CoV strains from SARS-CoV-2 and CoVZC/PrC31 clusters showing the chimeric nature of MP789 sequence. In this alignment, the polymorphic positions where the sequence of pangolin CoV\_MP789 is identical to that of CoVZC/PrC31 cluster of viruses are highlighted in yellow, whereas the polymorphic positions where the sequence of pangolin-CoV\_MP789 is similar to SARS-CoV-2r viruses are highlighted in blue. Location containing Ssp1 restriction site is highlighted with red box and labelled.**

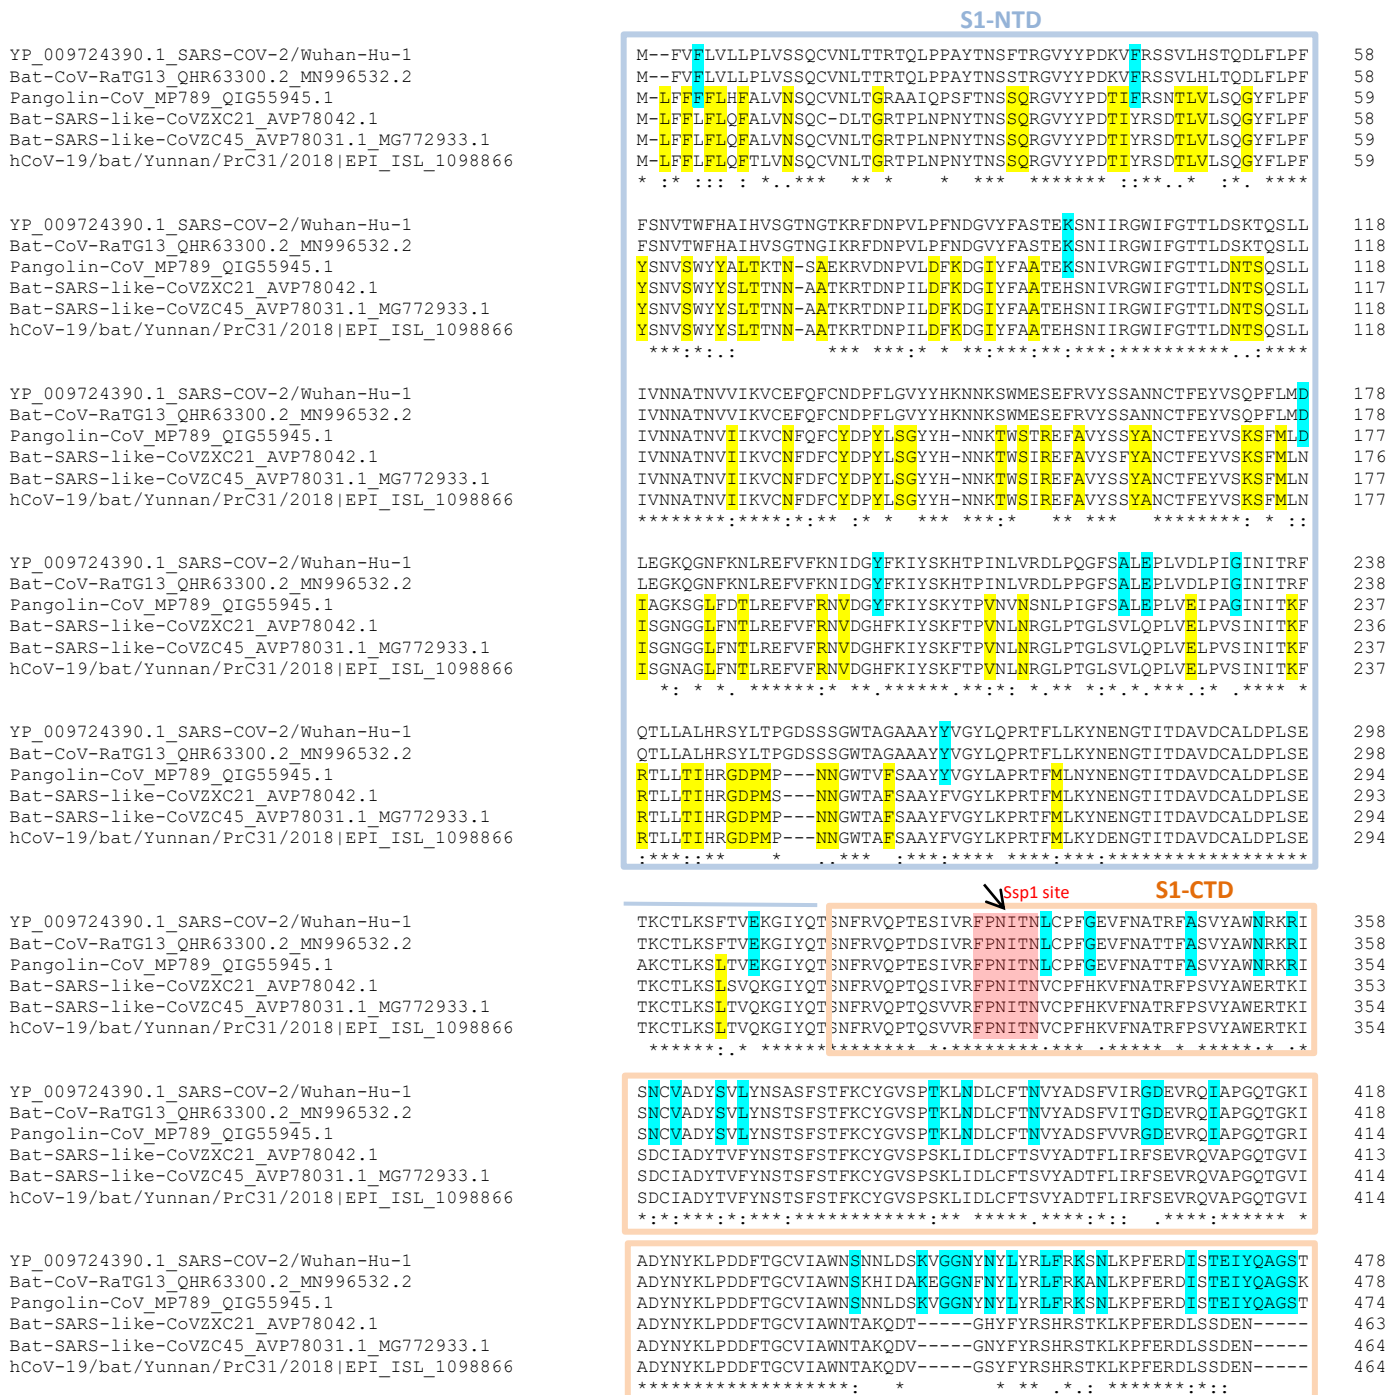



YP\_009724390.1\_SARS-COV-2/Wuhan-Hu-1 PAICHDGKAHFPRREGVFSVNGTHWFVTQRNFYEPQIIITDNTFVSGNCDVVIGIVNNTVY 1138  
Bat-CoV-RaTG13\_QHR63300.2\_MN996532.2 PAICHDGKAHFPRREGVFSVNGTHWFVTQRNFYEPQIIITDNTFVSGCDVVIGIVNNTVY 1134  
Pangolin-CoV\_MP789\_QIG55945.1 PAICHEGKAHFPRREGVFSVNGTHWFVTQRNFYEPQIIITDNTFVSGCDVVIGIVNNTVY 1130  
Bat-SARS-like-CoVZXC21\_AVP78042.1 PAICHEGKAHFPRREGVFSVNGTHWFVTQRNFYEPQIIITDNTFVSGNCDVVIGIINNTVY 1110  
Bat-SARS-like-CoVZC45\_AVP78031.1\_MG772933.1 PAICHEGKAHFPRREGVFSVNGTHWFVTQRNFYEPKIIITDNTFVSGNCDVVIGIINNTVY 1111  
hCoV-19/bat/Yunnan/PrC31/2018|EPI\_ISL\_1098866 PAICHDGKAHFPRREGVFSVNGTHWFITQRNFYEPQIIITDNTFVSGNCDVVIGIVNNTVY 1111  
\*\*\*\*\*:\*\*\*\*\*:\*\*\*\*\*:\*\*\*\*\*:\*\*\*\*\* \*\*\*\*\*:\*\*\*\*\*

YP\_009724390.1\_SARS-COV-2/Wuhan-Hu-1 DPLQPELDSFKEELDKYFKNHTSPDIDLGDISGINASVVNIQKEIDRLNEVAKNLNESLI 1198  
Bat-CoV-RaTG13\_QHR63300.2\_MN996532.2 DPLQPELDSFKEELDKYFKNHTSPDIDLGDISGINASVVNIQKEIDRLNEVAKNLNESLI 1194  
Pangolin-CoV\_MP789\_QIG55945.1 DPLQPELDSFKEELDKYFKNHTSPDIDLGDISGINASVVNIQKEIDRLNEVAKNLNESLI 1190  
Bat-SARS-like-CoVZXC21\_AVP78042.1 DPLQPELDSFKEELDKYFKNHTSPDIDLGDISGINASVVNIQKEIDRLNEVARNLNESLI 1170  
Bat-SARS-like-CoVZC45\_AVP78031.1\_MG772933.1 DPLQPELDSFKEELDKYFKNHTSPDIDLGDISGINASVVNIQKEIDRLNEVARNLNESLI 1171  
hCoV-19/bat/Yunnan/PrC31/2018|EPI\_ISL\_1098866 DPLQPELDSFKEELDKYFKNHTSPDIDLGDISGINASVVNIQKEIDRLNEVARNLNESLI 1171  
\*\*\*\*\*:\*\*\*\*\*:\*\*\*\*\*:\*\*\*\*\*:\*\*\*\*\* \*\*\*\*\*:\*\*\*\*\*

YP\_009724390.1\_SARS-COV-2/Wuhan-Hu-1 DLQELGKYEYIKWPWYIWLGFIAGLIAIVMVTIMLCCMTSCCSCLKGCCSCGSCCKFDE 1258  
Bat-CoV-RaTG13\_QHR63300.2\_MN996532.2 DLQELGKYEYIKWPWYIWLGFIAGLIAIVMVTIMLCCMTSCCSCLKGCCSCGSCCKFDE 1254  
Pangolin-CoV\_MP789\_QIG55945.1 DLQELGKYEYIKWPWYIWLGFIAGLIAIVMVTIMLCCMTSCCSCLKGCCSCGSCCKFDE 1250  
Bat-SARS-like-CoVZXC21\_AVP78042.1 DLQELGKYEYIKWPWYVWLGFIAGLIAIVMVTILLCCMTSCCSCLKGCCSCGSCCKFDE 1230  
Bat-SARS-like-CoVZC45\_AVP78031.1\_MG772933.1 DLQELGKYEYIKWPWYVWLGFIAGLIAIVMVTILLCCMTSCCSCLKGCCSCGSCCKFDE 1231  
hCoV-19/bat/Yunnan/PrC31/2018|EPI\_ISL\_1098866 DLQELGKYEYIKWPWYVWLGFIAGLIAIVMVTILLCCMTSCCSCLKGCCSCGSCCKFDE 1231  
\*\*\*\*\*:\*\*\*\*\*:\*\*\*\*\*:\*\*\*\*\*:\*\*\*\*\* \*\*\*\*\*:\*\*\*\*\*

YP\_009724390.1\_SARS-COV-2/Wuhan-Hu-1 DDSEPVKGVKLYHT 1273  
Bat-CoV-RaTG13\_QHR63300.2\_MN996532.2 DDSEPVKGVKLYHT 1269  
Pangolin-CoV\_MP789\_QIG55945.1 DDSEPVKGVKLYHT 1265  
Bat-SARS-like-CoVZXC21\_AVP78042.1 DDSEPVKGVKLYHT 1245  
Bat-SARS-like-CoVZC45\_AVP78031.1\_MG772933.1 DDSEPVKGVKLYHT 1246  
hCoV-19/bat/Yunnan/PrC31/2018|EPI\_ISL\_1098866 DDSEPVKGVKLYHT 1246  
\*\*\*\*\*
