# Supplementary material for: Conserved molecular signatures in the spike protein provide evidence indicating the origin of SARS-CoV-2 and a Pangolin-CoV (MP789) by recombination(s) between specific lineages of Sarbecoviruses
Source: PubMed Central journal article supplement (PMC8592051; doi:10.7717/peerj.12434), 2021-11-12
Supplement: peerj-09-12434-s005.pdf [file peerj-09-12434-s005.pdf]

|                                                         |                                                           |                                      |      |
|---------------------------------------------------------|-----------------------------------------------------------|--------------------------------------|------|
| YP_009724390.1_SARS-COV-2/ Wuhan-Hu-1                   | YGDCLGIAARDLCAQKFNGLTVLPPLTDE                             | MIAQYTSALLAGTITSWTFGAGAALQI          | 896  |
| Bat-CoV-RaTG13_QHR63300.2_MN996532.2                    | YGDCLGIAARDLCAQKFNGLTVLPPLTDE                             | MIAQYTSALLAGTITSWTFGAGAALQI          | 892  |
| Bat-SARS-like-CoVZC45_AVP78031.1_MG772933.1             | YGDCLGGISARDLCAQKFNGLTVLPPLTDE                            | MIAAYTAALISGTATAGWTFGAGAALQI         | 869  |
| hCoV-19/ bat/ Yunnan/ PrC31/ 2018  EPI_ISL_1098866      | YGDCLGGISARDLCAQKFNGLTVLPPLTDE                            | MIAAYTAALISGTATAGWTFGAGAALQI         | 869  |
| hCoV-19/ bat/ Cambodia/ RShSTT182/ 2010  EPI_ISL_852604 | YGDCLGIAARDLCAQKFNGLTVLPPLTDE                             | MIAQYTSALLAGTITSWTFGAGAALQI          | 874  |
| hCoV-19/ bat/ Cambodia/ RShSTT200/ 2010  EPI_ISL_852605 | YGDCLGIAARDLCAQKFNGLTVLPPLTDE                             | MIAQYTSALLAGTITSWTFGAGAALQI          | 874  |
| AGT21078.1_SARS_coronavirus_ExoN1                       | YGECLGINARDLCAQKFNGLTVLPPLTDDMIAAYTAALVSGTATAGWTFGAGAALQI |                                      | 878  |
| AAR86775.1_SARS_coronavirus_ShanghaiQXC2                | YGECLGINARDLCAQKFNGLTVLPPLTDDMIAAYTAALVSGTATAGWTFGAGAALQI |                                      | 878  |
|                                                         | **:*:* * *****:**** **:*:* **:*:*****                     |                                      |      |
| YP_009724390.1_SARS-COV-2/ Wuhan-Hu-1                   | PFAMQMAYRFNGIGVTONVLYENOKLIANQFN                          | SAIGKIQDLSSTASALGKLDQVNVQNA          | 956  |
| Bat-CoV-RaTG13_QHR63300.2_MN996532.2                    | PFAMQMAYRFNGIGVTONVLYENOKLIANQFN                          | SAIGKIQDLSSTASALGKLDQVNVQNA          | 952  |
| Bat-SARS-like-CoVZC45_AVP78031.1_MG772933.1             | PFAMQMAYRFNGIGVTONVLYENOKLIANQFN                          | SAIGKIQESLSTASALGKLDQVNVQNA          | 929  |
| hCoV-19/ bat/ Yunnan/ PrC31/ 2018  EPI_ISL_1098866      | PFAMQMAYRFNGIGVTONVLYENOKLIANQFN                          | SAIGKIQESLSTASALGKLDQVNVQNA          | 929  |
| hCoV-19/ bat/ Cambodia/ RShSTT182/ 2010  EPI_ISL_852604 | PFAMQMAYRFNGIGVTONVLYENOKLIANQFN                          | SAIGKIQDLSSTASALGKLDQVNVQNA          | 934  |
| hCoV-19/ bat/ Cambodia/ RShSTT200/ 2010  EPI_ISL_852605 | PFAMQMAYRFNGIGVTONVLYENOKLIANQFN                          | SAIGKIQDLSSTASALGKLDQVNVQNA          | 934  |
| AGT21078.1_SARS_coronavirus_ExoN1                       | PFAMQMAYRFNGIGVTONVLYENOKQIANQFNKAI                       | SOIQESLTTTSTALGKLDQVNVQNA            | 938  |
| AAR86775.1_SARS_coronavirus_ShanghaiQXC2                | PFAMQMAYRFNGIGVTONVLYENOKQIANQFNKAI                       | SOIQESLTTTSTALGKLDQVNVQNA            | 938  |
|                                                         | ***** **:*:* **:*:*****                                   |                                      |      |
| YP_009724390.1_SARS-COV-2/ Wuhan-Hu-1                   | QALNTLVKQLSSNFGAISSVLDILSRDKVEAEVQIDRLITGRQLS             | LQTYVTQQLIRAA                        | 1016 |
| Bat-CoV-RaTG13_QHR63300.2_MN996532.2                    | QALNTLVKQLSSNFGAISSVLDILSRDKVEAEVQIDRLITGRQLS             | LQTYVTQQLIRAA                        | 1012 |
| Bat-SARS-like-CoVZC45_AVP78031.1_MG772933.1             | QALNTLVKQLSSNFGAISSVLDILSRDKVEAEVQIDRLITGRQLS             | LQTYVTQQLIRAA                        | 989  |
| hCoV-19/ bat/ Yunnan/ PrC31/ 2018  EPI_ISL_1098866      | QALNTLVKQLSSNFGAISSVLDILSRDKVEAEVQIDRLITGRQLS             | LQTYVTQQLIRAA                        | 989  |
| hCoV-19/ bat/ Cambodia/ RShSTT182/ 2010  EPI_ISL_852604 | QALNTLVKQLSSNFGAISSVLDILSRDKVEAEVQIDRLITGRQLS             | LQTYVTQQLIRAA                        | 994  |
| hCoV-19/ bat/ Cambodia/ RShSTT200/ 2010  EPI_ISL_852605 | QALNTLVKQLSSNFGAISSVLDILSRDKVEAEVQIDRLITGRQLS             | LQTYVTQQLIRAA                        | 994  |
| AGT21078.1_SARS_coronavirus_ExoN1                       | QALNTLVKQLSSNFGAISSVLDILSRDKVEAEVQIDRLITGRQLS             | LQTYVTQQLIRAA                        | 998  |
| AAR86775.1_SARS_coronavirus_ShanghaiQXC2                | QALNTLVKQLSSNFGAISSVLDILSRDKVEAEVQIDRLITGRQLS             | LQTYVTQQLIRAA                        | 998  |
|                                                         | ***** **:*:* **:*:*****                                   |                                      |      |
| YP_009724390.1_SARS-COV-2/ Wuhan-Hu-1                   | EIRASANLAATKMSECVLQSKRVDFCGKGYHLSMFPQ                     | SAPHGVVFLHVTYIPAQEKNFT               | 1076 |
| Bat-CoV-RaTG13_QHR63300.2_MN996532.2                    | EIRASANLAATKMSECVLQSKRVDFCGKGYHLSMFPQ                     | SAPHGVVFLHVTYIPAQEKNFT               | 1072 |
| Bat-SARS-like-CoVZC45_AVP78031.1_MG772933.1             | EIRASANLAATKMSECVLQSKRVDFCGKGYHLSMFPQ                     | SAPHGVVFLHVTYIPSQEKNFT               | 1049 |
| hCoV-19/ bat/ Yunnan/ PrC31/ 2018  EPI_ISL_1098866      | EIRASANLAATKMSECVLQSKRVDFCGKGYHLSMFPQ                     | SAPHGVVFLHVTYIPSQEKNFT               | 1049 |
| hCoV-19/ bat/ Cambodia/ RShSTT182/ 2010  EPI_ISL_852604 | EIRASANLAATKMSECVLQSKRVDFCGKGYHLSMFPQ                     | SAPHGVVFLHVTYIPAQEKNFT               | 1054 |
| hCoV-19/ bat/ Cambodia/ RShSTT200/ 2010  EPI_ISL_852605 | EIRASANLAATKMSECVLQSKRVDFCGKGYHLSMFPQ                     | SAPHGVVFLHVTYIPAQEKNFT               | 1054 |
| AGT21078.1_SARS_coronavirus_ExoN1                       | EIRASANLAATKMSECVLQSKRVDFCGKGYHLSMFPQ                     | AAAPHGVVFLHVTYIPSQERNFT              | 1058 |
| AAR86775.1_SARS_coronavirus_ShanghaiQXC2                | EIRASANLAATKMSECVLQSKRVDFCGKGYHLSMFPQ                     | AAAPHGVVFLHVTYIPSQERNFT              | 1058 |
|                                                         | ***** **:*:* **:*:*****                                   |                                      |      |
| YP_009724390.1_SARS-COV-2/ Wuhan-Hu-1                   | TAPAICHGKAHFPREGVVFVSN                                    | GTHWFVTRQNFYEPQIITDNTFVSGCDVVIGIVNNT | 1136 |
| Bat-CoV-RaTG13_QHR63300.2_MN996532.2                    | TAPAICHGKAHFPREGVVFVSN                                    | GTHWFVTRQNFYEPQIITDNTFVSGCDVVIGIVNNT | 1132 |
| Bat-SARS-like-CoVZC45_AVP78031.1_MG772933.1             | TAPAICHEGKAHFPREGVVFVSN                                   | GTHWFVTRQNFYEPKIITDNTFVSGCDVVIGIINNT | 1109 |
| hCoV-19/ bat/ Yunnan/ PrC31/ 2018  EPI_ISL_1098866      | TAPAICHGKAHFPREGVVFVSN                                    | GTHWFVTRQNFYEPQIITDNTFVSGCDVVIGIVNNT | 1109 |
| hCoV-19/ bat/ Cambodia/ RShSTT182/ 2010  EPI_ISL_852604 | TAPAICHGKAHFPREGVVFVSN                                    | GTHWFVTRQNFYEPQIITDNTFVSGCDVVIGIVNNT | 1114 |
| hCoV-19/ bat/ Cambodia/ RShSTT200/ 2010  EPI_ISL_852605 | TAPAICHGKAHFPREGVVFVSN                                    | GTHWFVTRQNFYEPQIITDNTFVSGCDVVIGIVNNT | 1114 |
| AGT21078.1_SARS_coronavirus_ExoN1                       | TAPAICHEGKAHFPREGVVFVNGTSWFI                              | TQRNFYEPQIITDNTFVSGCDVVIGIINNT       | 1118 |
| AAR86775.1_SARS_coronavirus_ShanghaiQXC2                | TAPAICHEGKAHFPREGVVFVNGTSWFI                              | TQRNFYEPQIITDNTFVSGCDVVIGIINNT       | 1118 |
|                                                         | ***** **:*:* **:*:*****                                   |                                      |      |
| YP_009724390.1_SARS-COV-2/ Wuhan-Hu-1                   | VYDPLQPELDSFKEELDKYFNKHTSPD                               | VLDGDISGINASVNIQEKIDRLNEVAKNLNES     | 1196 |
| Bat-CoV-RaTG13_QHR63300.2_MN996532.2                    | VYDPLQPELDSFKEELDKYFNKHTSPD                               | VLDGDISGINASVNIQEKIDRLNEVAKNLNES     | 1192 |
| Bat-SARS-like-CoVZC45_AVP78031.1_MG772933.1             | VYDPLQPELDSFKEELDKYFNKHTSPD                               | LDGDISGINASVNIQEKIDRLNEVARNLNES      | 1169 |
| hCoV-19/ bat/ Yunnan/ PrC31/ 2018  EPI_ISL_1098866      | VYDPLQPELDSFKEELDKYFNKHTSPD                               | LDGDISGINASVNIQEKIDRLNEVARNLNES      | 1169 |
| hCoV-19/ bat/ Cambodia/ RShSTT182/ 2010  EPI_ISL_852604 | VYDPLQPELDSFKEELDKYFNKHTSPD                               | VLDGDISGINASVNIQEKIDRLNEVAKNLNES     | 1174 |
| hCoV-19/ bat/ Cambodia/ RShSTT200/ 2010  EPI_ISL_852605 | VYDPLQPELDSFKEELDKYFNKHTSPD                               | VLDGDISGINASVNIQEKIDRLNEVAKNLNES     | 1174 |
| AGT21078.1_SARS_coronavirus_ExoN1                       | VYDPLQPELDSFKEELDKYFNKHTSPD                               | VLDGDISGINASVNIQEKIDRLNEVAKNLNES     | 1178 |
| AAR86775.1_SARS_coronavirus_ShanghaiQXC2                | VYDPLQPELDSFKEELDKYFNKHTSPD                               | VLDGDISGINASVNIQEKIDRLNEVAKNLNES     | 1178 |
|                                                         | ***** **:*:* **:*:*****                                   |                                      |      |
| YP_009724390.1_SARS-COV-2/ Wuhan-Hu-1                   | LIDLQELGKYEYIKWPWYIWLGF                                   | IAGLIAIVMVTIMLCCMSTCCSCLKGCCSCGSCCKF | 1256 |
| Bat-CoV-RaTG13_QHR63300.2_MN996532.2                    | LIDLQELGKYEYIKWPWYIWLGF                                   | IAGLIAIVMVTIMLCCMSTCCSCLKGCCSCGSCCKF | 1252 |
| Bat-SARS-like-CoVZC45_AVP78031.1_MG772933.1             | LIDLQELGKYEYIKWPWYIWLGF                                   | IAGLIAIVMVTILLCCMSTCCSCLKGCCSCGSCCKF | 1229 |
| hCoV-19/ bat/ Yunnan/ PrC31/ 2018  EPI_ISL_1098866      | LIDLQELGKYEYIKWPWYIWLGF                                   | IAGLIAIVMVTILLCCMSTCCSCLKGCCSCGSCCKF | 1229 |
| hCoV-19/ bat/ Cambodia/ RShSTT182/ 2010  EPI_ISL_852604 | LIDLQELGKYEYIKWPWYIWLGF                                   | IAGLIAIVMVTIMLCCMSTCCSCLKGCCSCGSCCKF | 1234 |
| hCoV-19/ bat/ Cambodia/ RShSTT200/ 2010  EPI_ISL_852605 | LIDLQELGKYEYIKWPWYIWLGF                                   | IAGLIAIVMVTIMLCCMSTCCSCLKGCCSCGSCCKF | 1234 |
| AGT21078.1_SARS_coronavirus_ExoN1                       | LIDLQELGKYEYIKWPWYIWLGF                                   | IAGLIAIVMVTILLCCMSTCCSCLKGACSCGSCCKF | 1238 |
| AAR86775.1_SARS_coronavirus_ShanghaiQXC2                | LIDLQELGKYEYIKWPWYIWLGF                                   | IAGLIAIVMVTILLCCMSTCCSCLKGACSCGSCCKF | 1238 |
|                                                         | ***** **:*:* **:*:*****                                   |                                      |      |
| AGT21078.1_SARS_coronavirus_ExoN1                       | DEDDSEPVLLKGVKLHYT                                        | 1255                                 |      |
| AAR86775.1_SARS_coronavirus_ShanghaiQXC2                | DEDDSEPVLLKGVKLHYT                                        | 1255                                 |      |
| Bat-SARS-like-CoVZXC21_AVP78042.1                       | DEDDSEPVLLKGVKLHYT                                        | 1245                                 |      |
| Bat-SARS-like-CoVZC45_AVP78031.1_MG772933.1             | DEDDSEPVLLKGVKLHYT                                        | 1246                                 |      |
| hCoV-19/ bat/ Yunnan/ PrC31/ 2018  EPI_ISL_1098866      | DEDDSEPVLLKGVKLHYT                                        | 1246                                 |      |
| hCoV-19/ bat/ Cambodia/ RShSTT182/ 2010  EPI_ISL_852604 | DEDDSEPVLLKGVKLHYT                                        | 1251                                 |      |
| hCoV-19/ bat/ Cambodia/ RShSTT200/ 2010  EPI_ISL_852605 | DEDDSEPVLLKGVKLHYT                                        | 1251                                 |      |
| YP_009724390.1_SARS-COV-2/ Wuhan-Hu-1                   | DEDDSEPVLLKGVKLHYT                                        | 1273                                 |      |
| Bat-CoV-RaTG13_QHR63300.2_MN996532.2                    | DEDDSEPVLLKGVKLHYT                                        | 1269                                 |      |
|                                                         | *****                                                     |                                      |      |
