# Supplementary material for: Conserved molecular signatures in the spike protein provide evidence indicating the origin of SARS-CoV-2 and a Pangolin-CoV (MP789) by recombination(s) between specific lineages of Sarbecoviruses
Source: PubMed Central journal article supplement (PMC8592051; doi:10.7717/peerj.12434), 2021-11-12
Supplement: peerj-09-12434-s006.pdf [file peerj-09-12434-s006.pdf]

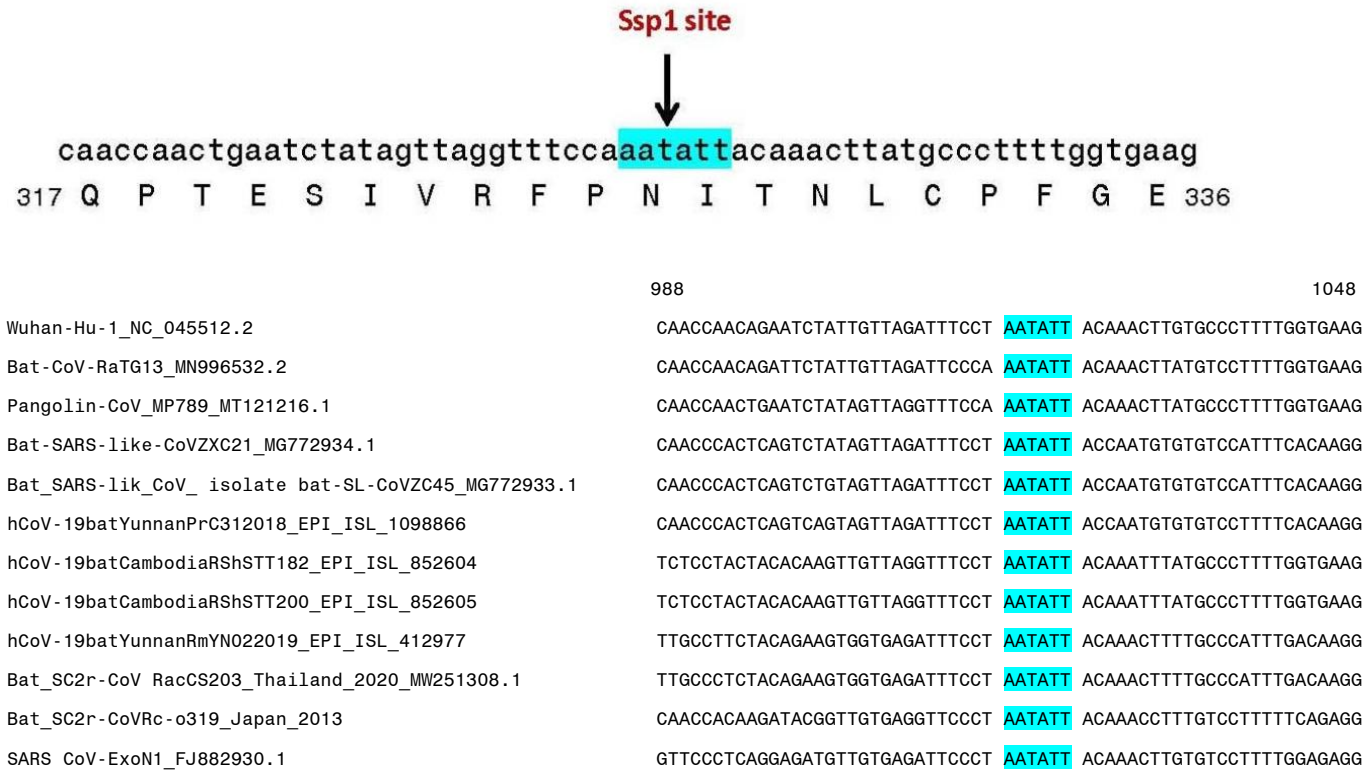

**Figure S6.** Nucleotide and amino acid sequence of the spike protein from pangolin-CoV\_MP789 surrounding the site where sequence changes from CoVZC-like to SARS-CoV-2 like sequence. This Ssp1 restriction site is also presented in the sequences of other Sarbecoviruses.
